# Supplementary material for: Self-assembly of metal–organic frameworks based on N-donor ligand and flexible tricarboxylic acids with different angular characters
Source: Royal Society of Chemistry journal article supplement (doi:10.1039/c3ce40910d), 2013-01-01
Supplement: c3ce40910d.pdf [file c3ce40910d.pdf]

## Electronic Supplementary Information

### Self-assembly of metal–organic frameworks based on N-donor ligand and flexible tricarboxylic acids with different angular characters

Lei Chen,<sup>a</sup> Li Zhang,<sup>a</sup> Shun-Li Li,<sup>\*b</sup> Yong-Qing Qiu,<sup>a</sup> Kui-Zhan Shao,<sup>\*a</sup> Xin-Long  
Wang<sup>a</sup> and Zhong-Min Su<sup>\*a</sup>

<sup>a</sup> Institute of Functional Material Chemistry, Faculty of Chemistry, Northeast Normal University, Changchun 130024, P. R. China

<sup>b</sup> Jiangsu Key Laboratory of Biofunctional Materials, College of Chemistry and Materials Science, Nanjing Normal University, Nanjing 210023, Jiangsu, P. R. China

\* Corresponding author.

E-mail: shaokz406@nenu.edu.cn; zmsu@nenu.edu.cn; slli@njnu.edu.cn

#### Synthesis of 5-(3-carboxybenzyloxy)isophthalic acid ( $H_3L^1$ )

A mixture of diethyl 5-hydroxyisophthalate (20 mmol, 4.76 g) and NaOH (20 mmol, 0.80 g) in DMF (50 mL) was stirred at 5 °C for 3 h, then 3-(chloromethyl)benzotrile (20 mmol, 3.02 g) was added. The mixture was cooled to room temperature after stirring at 90 °C for 12 h, and then poured into 200 mL of water. A white solid of diethyl 5-(3-cyanobenzyloxy)isophthalate was deposited, which was isolated by filtration in 66 % yield after drying in air.

Then a mixture of diethyl 5-(3-cyanobenzyloxy)isophthalate (15.60 mmol, 5.52 g) and sodium hydroxide (100 mmol, 4.00 g) in water (80 mL) was stirred at 100 °C for 12 h, and was cooled to room temperature. The mixture was adjusted to approximately pH 4.5 with dilute hydrochloric acid. A white solid of  $H_3L^1$  formed immediately, which was isolated by filtration in 60 % yield after drying in air.

Elemental analyses calcd (%) for  $C_{16}H_{12}O_7$  (316.26): C, 60.76; H, 3.82. Found C, 60.77; H, 3.81. IR (KBr pellet,  $cm^{-1}$ ): 2958 (m), 1679 (m), 1628 (s), 1598 (s), 1508 (s), 1423 (m), 1367 (m), 1305 (m), 1240 (s), 1167 (s), 1026 (w), 983 (m), 866 (w), 827 (m), 670 (w), 516 (w).

### Synthesis of 5-(4-carboxybenzyloxy)isophthalic acid ( $H_3L^2$ )

$H_3L^2$  was prepared in the same way as  $H_3L^1$  by using the corresponding 4-(chloromethyl)benzonitrile instead of 3-(chloromethyl)benzonitrile. IR ( $cm^{-1}$ ): 2965 (w), 1734 (s), 1690 (s), 1598 (s), 1460 (m), 1285 (s), 1206 (s), 1121 (m), 1057 (m), 889 (w), 765 (m), 664 (w), 531 (w).

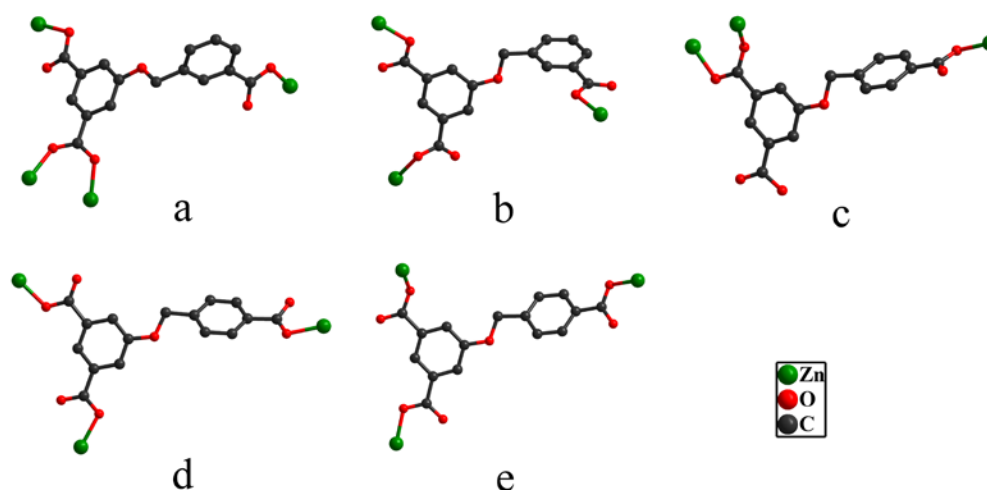

**Scheme S1** Coordination modes of the ligand in complexes **1-5**.

**Table S1** Selected bond lengths ( $\text{\AA}$ ) and angles ( $^\circ$ ) for complexes **1-5**.

| Complex 1           |          |                   |          |
|---------------------|----------|-------------------|----------|
| Zn(1)-O(8)#1        | 1.968(6) | Zn(1)-O(4)#1      | 2.013(5) |
| Zn(1)-O(1)          | 2.012(6) | Zn(1)-N(1)        | 2.062(6) |
| Zn(2)-O(8)          | 1.902(6) | Zn(2)-O(6)#2      | 1.959(5) |
| Zn(2)-O(3)          | 2.013(6) | Zn(2)-N(4)#3      | 2.016(7) |
| O(8)#1-Zn(1)-O(4)#1 | 103.5(2) | O(8)#1-Zn(1)-O(1) | 119.0(2) |
| O(4)#1-Zn(1)-O(1)   | 96.6(2)  | O(8)#1-Zn(1)-N(1) | 103.1(2) |
| O(4)#1-Zn(1)-N(1)   | 97.3(2)  | O(1)-Zn(1)-N(1)   | 130.7(2) |

|                      |            |                     |            |
|----------------------|------------|---------------------|------------|
| O(8)-Zn(2)-O(6)#2    | 116.9(2)   | O(8)-Zn(2)-O(3)     | 103.9(2)   |
| O(6)#2-Zn(2)-O(3)    | 101.6(2)   | O(8)-Zn(2)-N(4)#3   | 123.7(3)   |
| O(6)#2-Zn(2)-N(4)#3  | 109.9(3)   | O(3)-Zn(2)-N(4)#3   | 95.3(3)    |
| <b>Complex 2</b>     |            |                     |            |
| Zn(1)-O(8)           | 1.933(3)   | Zn(1)-O(2)          | 1.950(3)   |
| Zn(1)-N(1)           | 2.000(4)   | Zn(1)-N(9)          | 2.057(4)   |
| Zn(2)-O(10)          | 1.926(3)   | Zn(2)-O(14)#1       | 1.964(3)   |
| Zn(2)-N(4)#2         | 2.009(4)   | Zn(2)-N(5)          | 2.011(4)   |
| Zn(3)-O(4)#3         | 1.965(4)   | Zn(3)-O(6)          | 1.967(3)   |
| Zn(3)-N(11)          | 2.010(4)   | Zn(3)-N(8)#4        | 2.032(4)   |
| O(8)-Zn(1)-O(2)      | 119.23(16) | O(8)-Zn(1)-N(1)     | 112.40(15) |
| O(2)-Zn(1)-N(1)      | 108.09(15) | O(8)-Zn(1)-N(9)     | 94.26(15)  |
| O(2)-Zn(1)-N(9)      | 104.52(15) | N(1)-Zn(1)-N(9)     | 118.07(16) |
| O(10)-Zn(2)-O(14)#1  | 111.69(16) | O(10)-Zn(2)-N(4)#2  | 113.89(16) |
| O(14)#1-Zn(2)-N(4)#2 | 117.93(18) | O(10)-Zn(2)-N(5)    | 108.32(15) |
| O(14)#1-Zn(2)-N(5)   | 100.13(15) | N(4)#2-Zn(2)-N(5)   | 103.04(16) |
| O(4)#3-Zn(3)-O(6)    | 98.24(16)  | O(4)#3-Zn(3)-N(11)  | 103.62(17) |
| O(6)-Zn(3)-N(11)     | 128.73(16) | O(4)#3-Zn(3)-N(8)#4 | 122.83(16) |
| O(6)-Zn(3)-N(8)#4    | 102.01(15) | N(11)-Zn(3)-N(8)#4  | 103.79(16) |
| <b>Complex 3</b>     |            |                     |            |
| Zn(1)-O(6)           | 1.935(4)   | Zn(1)-O(3)#1        | 1.967(4)   |
| Zn(1)-O(4)#2         | 1.996(4)   | Zn(1)-N(1)          | 2.016(5)   |
| O(6)-Zn(1)-O(3)#1    | 116.45(18) | O(6)-Zn(1)-O(4)#2   | 112.63(18) |
| O(3)#1-Zn(1)-O(4)#2  | 109.84(17) | O(6)-Zn(1)-N(1)     | 98.38(19)  |
| O(3)#1-Zn(1)-N(1)    | 114.61(18) | O(4)#2-Zn(1)-N(1)   | 103.87(19) |
| <b>Complex 4</b>     |            |                     |            |
| Zn(1)-O(3)           | 1.963(3)   | Zn(1)-O(1)#6        | 1.968(4)   |
| Zn(1)-N(1)           | 2.005(5)   | Zn(1)-N(5)          | 2.011(4)   |
| Zn(2)-O(9)           | 1.948(4)   | Zn(2)-O(6)          | 1.984(5)   |
| Zn(2)-N(4)#1         | 1.994(5)   | Zn(2)-N(9)          | 2.017(5)   |
| Zn(3)-O(11)#5        | 1.910(4)   | Zn(3)-O(14)         | 1.933(5)   |
| Zn(3)-N(8)#7         | 2.000(4)   | Zn(3)-N(12)#3       | 1.995(4)   |
| O(3)-Zn(1)-O(1)#6    | 112.01(16) | O(3)-Zn(1)-N(1)     | 111.70(17) |
| O(1)#6-Zn(1)-N(1)    | 111.27(17) | O(3)-Zn(1)-N(5)     | 95.35(16)  |
| O(1)#6-Zn(1)-N(5)    | 109.24(17) | N(1)-Zn(1)-N(5)     | 116.36(18) |

|                     |            |                       |            |
|---------------------|------------|-----------------------|------------|
| O(9)-Zn(2)-O(6)     | 108.4(2)   | O(9)-Zn(2)-N(4)#1     | 114.8(2)   |
| O(6)-Zn(2)-N(4)#1   | 118.7(2)   | O(9)-Zn(2)-N(9)       | 107.43(19) |
| O(6)-Zn(2)-N(9)     | 97.2(2)    | N(4)#1-Zn(2)-N(9)     | 108.4(2)   |
| O(11)#5-Zn(3)-O(14) | 113.0(2)   | O(11)#5-Zn(3)-N(8)#7  | 107.8(2)   |
| O(14)-Zn(3)-N(8)#7  | 100.9(2)   | O(11)#5-Zn(3)-N(12)#3 | 104.5(2)   |
| O(14)-Zn(3)-N(12)#3 | 121.8(2)   | N(8)#7-Zn(3)-N(12)#3  | 108.1(2)   |
| <b>Complex 5</b>    |            |                       |            |
| Zn(1)-O(6)#4        | 1.950(3)   | Zn(1)-O(6)#5          | 1.950(3)   |
| Zn(1)-N(1)          | 2.020(4)   | Zn(1)-N(1)#6          | 2.020(4)   |
| Zn(2)-O(2)          | 1.938(3)   | Zn(2)-O(4)#7          | 1.958(3)   |
| Zn(2)-N(4)          | 2.012(4)   | Zn(2)-N(5)            | 2.008(4)   |
| O(6)#4-Zn(1)-O(6)#5 | 127.78(19) | O(6)#4-Zn(1)-N(1)     | 113.42(15) |
| O(6)#5-Zn(1)-N(1)   | 99.12(15)  | O(6)#4-Zn(1)-N(1)#6   | 99.12(15)  |
| O(6)#5-Zn(1)-N(1)#6 | 113.42(15) | N(1)-Zn(1)-N(1)#6     | 101.6(2)   |
| O(2)-Zn(2)-O(4)#7   | 120.97(14) | O(2)-Zn(2)-N(4)       | 117.74(15) |
| O(4)#7-Zn(2)-N(4)   | 102.50(15) | O(2)-Zn(2)-N(5)       | 95.44(15)  |
| O(4)#7-Zn(2)-N(5)   | 109.26(15) | N(4)-Zn(2)-N(5)       | 110.63(15) |

<sup>a</sup>Symmetry transformations used to generate equivalent atoms: for **1**: #1  $x+1, y, z$ ; #2  $x, y, z-1$ ; #3  $-x+2, -y+1, -z+1$ ; for **2**: #1  $x+1, y, z$ ; #2  $x, y, z-1$ ; #3  $-x+2, -y+1, -z+2$ ; #4  $-x+2, -y+2, -z+2$ ; for **3**: #1  $x+1, y+1, z-1$ ; #2  $-x+2, -y, -z+2$ ; for **4**: #1  $-x, -y, -z+2$ ; #3  $-x+3, -y, -z+2$ ; #5  $-x+2, -y, -z+1$ ; #6  $x-1/2, -y+1/2, z-1/2$ ; #7  $-x-1/2, y-1/2, -z+3/2$ ; for **5**: #4  $-x+1/2, y-5/2, -z+3/2$ ; #5  $x-1/2, y-5/2, z$ ; #6  $-x, y, -z+3/2$ ; #7  $x-1/2, y-1/2, z$ .

**Table S2** Distances (Å) and Angles (°) of Hydrogen bonds for complexes **3**.

| D-H...A              | $d(\text{H}\cdots\text{A})$ | $d(\text{D}\cdots\text{A})$ | $\angle\text{D-H}\cdots\text{A}$ |
|----------------------|-----------------------------|-----------------------------|----------------------------------|
| O(1)-H(1c)...O(1W)   | 1.680(2)                    | 2.568(5)                    | 165(8)                           |
| O(1W)-H(1B)...O(7)#1 | 1.864(2)                    | 2.700(5)                    | 168(2)                           |
| O(1W)-H(1A)...O(2)#2 | 2.129(2)                    | 2.842(5)                    | 141(2)                           |

Symmetry transformations used to generate equivalent atoms: for **3**: #1  $x+1, y+1, z-1$ ; #2  $-x+2, -y, -z+2$ .

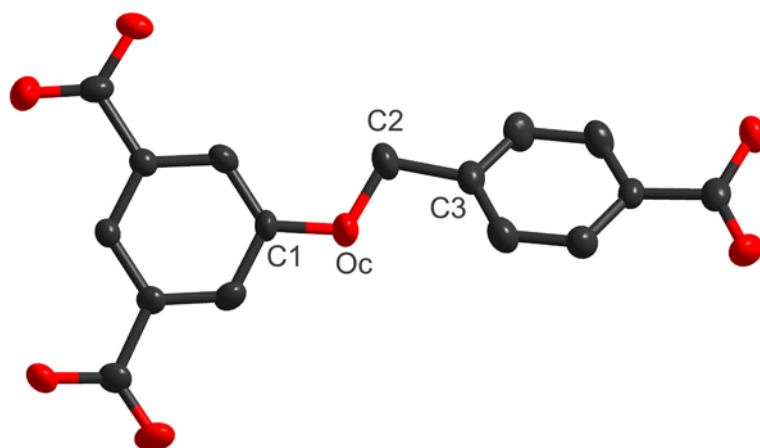

**Scheme S2** Schematic description of the flexible  $-\text{O}-\text{CH}_2-$  group.

**Table S3** The bond distances and angles in the carboxylate ligands.

| Compound | Oc-Zn | twisted angle of<br>C1-Oc-C2-C3 | dihedral angle of two<br>rings in the same ligand |
|----------|-------|---------------------------------|---------------------------------------------------|
| 1        | 7.79  | 164.24                          | 81.82                                             |
|          | 7.04  |                                 |                                                   |
|          | 7.01  |                                 |                                                   |
|          | 7.85  |                                 |                                                   |
| 2        | 7.17  | 179.27                          | 74.81                                             |
|          | 7.02  |                                 |                                                   |
|          | 7.66  |                                 |                                                   |
|          | 6.92  | -175.60                         | 75.55                                             |
|          | 7.77  |                                 |                                                   |
|          | 8.07  |                                 |                                                   |
| 3        | 9.08  | -176.37                         | 58.60                                             |
|          | 5.70  |                                 |                                                   |
|          | 7.61  |                                 |                                                   |
| 4        | 8.93  | -170.55                         | 42.39                                             |
|          | 7.79  |                                 |                                                   |
|          | 8.90  |                                 |                                                   |

|   |      |        |       |
|---|------|--------|-------|
| 5 | 7.51 | 175.43 | 33.75 |
|   | 6.21 |        |       |
|   | 8.99 |        |       |

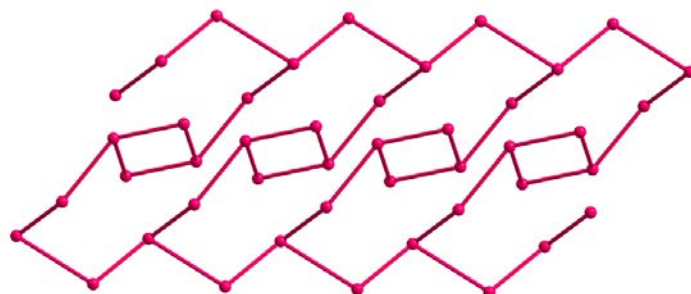

**Fig. S1** The 1D infinite chain topology in **2**.

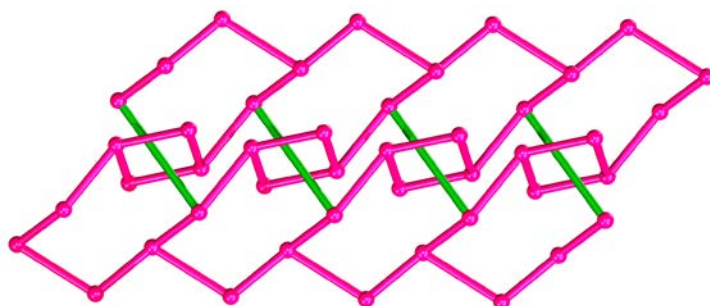

**Fig. S2** Schematic representations of the 1D infinite chain self-penetrated by BIMB ligands in **2**

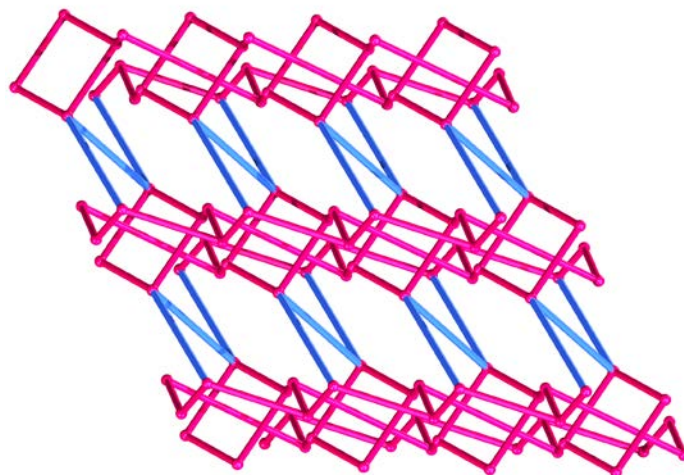

**Fig. S3** The 2D layer network of **2**.

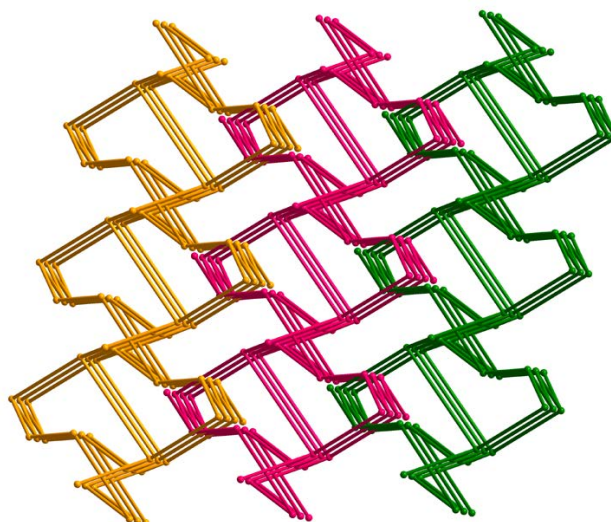

**Fig. S4** Each 2D layer is interpenetrated by another two similar layers to form a three-folded framework.

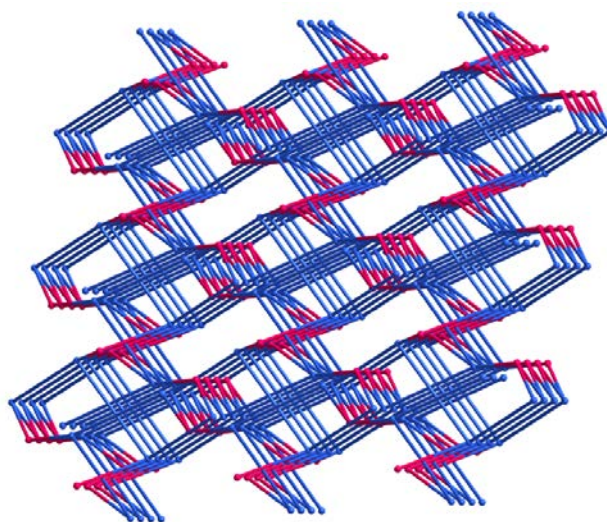

**Fig. S5** Schematic illustrating the 3D (3,4)-connected network in **2**.

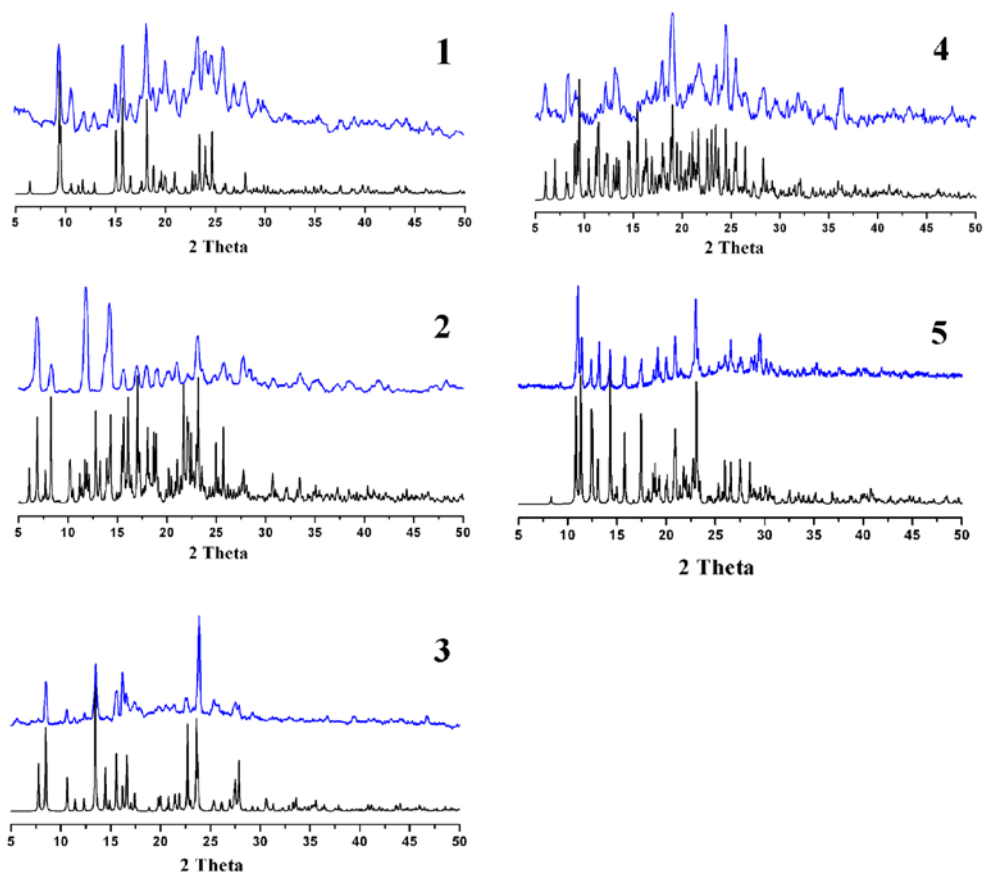

**Fig. S6** The simulated (black) and experimental (blue) PXRD patterns for complexes 1-5



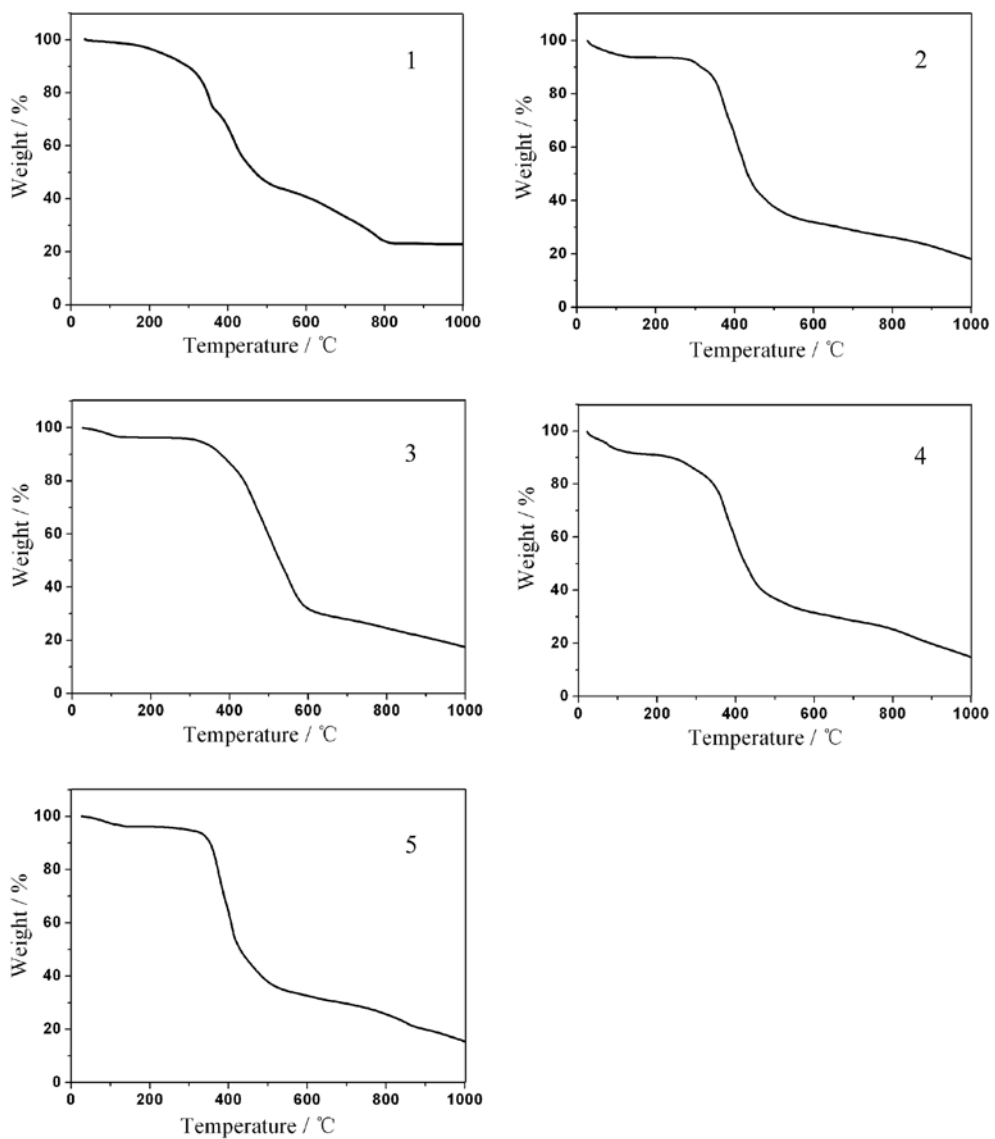

**Fig. S7** TG curves of complexes 1-5.
